# Supplementary material for: Scrutinizing the Vulnerability of Ephemeral Diffie–Hellman over COSE (EDHOC) for IoT Environment Using Formal Approaches
Source: Hindawi journal article supplement (doi:10.1155/2021/7314508), 2021-09-13
Supplement: f1 [file 7314508.f1.pdf]

## Supplementary Material

### The HLPSL file for the asymmetric-key option EDHOC protocol

```
role initiator(
  A,B: agent,
  PK_I,PK_R: public_key,
  G: text,
  H: hash_func,
  SND, RCV: channel(dy)
)played_by A def=

local
  State: nat,
  X,Ci,Cr,CRED_R,CRED_I: text,
  Gx,Gy,Gxy : message

init
  State:=0

transition
  1.      State= 0  ^ RCV(start) =>
          State':= 2 ^ Ci':= new()
                    ^ X':= new()
                    ^ Gx':= exp(G,X')
                    ^ SND(Gx'.Ci')

  2.      State= 2
          ^ RCV(Ci.Cr'.Gy'.{{CRED_R'.H(Gx.Ci.Ci.Cr'.Gy')}}_inv(PK_R))_H(H(exp(Gy',X)).H(Gx.Ci.Ci.Cr'.Gy')) =>
          State':= 4 ^ Gxy':= exp(Gy',X)
                    ^ CRED_I':= new()

          ^ SND(Cr'.{{CRED_I'.H(H(H(Gx.Ci.Ci.Cr'.Gy')).{{CRED_R'.H(Gx.Ci.Ci.Cr'.Gy')}}_inv(PK_R))_H(H(Gxy').H(
          Gx.Ci.Ci.Cr'.Gy'))).Cr')}}_inv(PK_I))_H(H(Gxy')).H(H(H(Gx.Ci.Ci.Cr'.Gy')).{{CRED_R'.H(Gx.Ci.Ci.Cr'.Gy')}}_inv
          (PK_R))_H(H(Gxy')).H(Gx.Ci.Ci.Cr'.Gy'))).Cr'))

          ^ witness(A,B,k3,H(H(H(Gx.Ci.Ci.Cr'.Gy')).{{CRED_R'.H(Gx.Ci.Ci.Cr'.Gy')}}_inv(PK_R))_H(H(Gx
          y').H(Gx.Ci.Ci.Cr'.Gy'))).Cr'))
                    ^ request(A,B,k2,H(H(exp(Gy',X)).H(Gx.Ci.Ci.Cr'.Gy'))))

end role

role responder(
  A,B: agent,
  PK_I,PK_R: public_key,
  G: text,
  H: hash_func,
  SND, RCV: channel(dy)
)played_by B def=

local
  State: nat,
  Y,Ci,Cr,CRED_I,CRED_R: text,
  Gx,Gy,Gxy: message

init
  State:=1

transition
  1.      State= 1  ^ RCV(Gx'.Ci') =>
          State':= 3 ^ Cr':= new()
                    ^ Y':= new()
                    ^ Gy':= exp(G,Y')
```

```

    ∧ Gxy' := exp(Gx', Y')
    ∧ CRED_R' := new()

  ∧ SND(Ci'.Cr'.Gy'.{{CRED_R'.H(Gx'.Ci'.Ci'.Cr'.Gy')}}_inv(PK_R)}_H(H(Gxy')).H(Gx'.Ci'.Ci'.Cr'.Gy'))
    ∧ witness(B,A,k2,H(H(Gxy')).H(Gx'.Ci'.Ci'.Cr'.Gy')))

2.      State= 3
  ∧ RCV(Cr.{{CRED_I'.H(H(H(Gx.Ci.Ci.Cr.Gy)).{{CRED_R.H(Gx.Ci.Ci.Cr.Gy)}}_inv(PK_R)}_H(H(Gxy)).H(Gx.
Ci.Ci.Cr.Gy))),Cr)}_inv(PK_I)}_H(H(Gxy)).H(H(H(Gx.Ci.Ci.Cr.Gy)).{{CRED_R.H(Gx.Ci.Ci.Cr.Gy)}}_inv(PK_R)
)}_H(H(Gxy)).H(Gx.Ci.Ci.Cr.Gy))),Cr))) =>
  State' := 5
  ∧ request(B,A,k3,H(H(Gxy)).H(H(H(Gx.Ci.Ci.Cr.Gy)).{{CRED_R.H(Gx.Ci.Ci.Cr.Gy)}}_inv(PK_R)}_H(H(Gxy).
H(Gx.Ci.Ci.Cr.Gy))),Cr)))

end role

role session(
A,B: agent,
PK_I,PK_R: public_key,
G: text,
H: hash_func
)def=

local
  SA,RA,SB,RB: channel(dy)

composition
  initiator(A,B,PK_I,PK_R,G,H,SA,RA) ∧
  responder(A,B,PK_I,PK_R,G,H,SB,RB)

end role

role environment()
def=

const
  a,b,i: agent,
  pk_a,pk_b,pk_i: public_key,
  g: text,
  h: hash_func,
  k2,k3: protocol_id

intruder_knowledge = {a,b,i,pk_a,pk_b,pk_i,g,h}

composition
  session(a,b,pk_a,pk_b,g,h) ∧
  session(i,b,pk_i,pk_b,g,h) ∧
  session(a,i,pk_a,pk_b,g,h)

end role

goal

authentication_on k2
authentication_on k3

end goal

environment()

```

## The HLPSL file for the symmetric-key option EDHOC protocol

```
role initiator(
  A,B: agent,
  PSK: symmetric_key,
  G: text,
  H: hash_func,
  SND, RCV: channel(dy)
)played_by A def=

local
  State: nat,
  X,Ci,Cr: text,
  Gx,Gy,Gxy : message

init
  State:=0

transition
  1.          State= 0   $\wedge$  RCV(start) =>
     State':= 2   $\wedge$  Ci':= new()
                  $\wedge$  X':= new()
                  $\wedge$  Gx':= exp(G,X')
                  $\wedge$  SND(Gx'.Ci')

  2.          State= 2   $\wedge$  RCV(Ci.Cr'.Gy'.{H(Gx.Ci.Ci.Cr'.Gy')}_H(H(PSK.exp(Gy',X)).H(Gx.Ci.Ci.Cr'.Gy')))) =>
     State':= 4   $\wedge$  Gxy':= exp(Gy',X)

                  $\wedge$  SND(Cr'.{H(H(H(Gx.Ci.Ci.Cr'.Gy').{H(Gx.Ci.Ci.Cr'.Gy')}_H(H(PSK.Gxy')).H(Gx.Ci.Ci.Cr'.Gy'))),Cr')}_H(H(
                 PSK.Gxy')).H(H(H(Gx.Ci.Ci.Cr'.Gy').{H(Gx.Ci.Ci.Cr'.Gy')}_H(H(PSK.Gxy')).H(Gx.Ci.Ci.Cr'.Gy'))),Cr'))

                  $\wedge$  witness(A,B,k3,H(H(PSK.Gxy')).H(H(H(Gx.Ci.Ci.Cr'.Gy').{H(Gx.Ci.Ci.Cr'.Gy')}_H(H(PSK.Gxy')).H(Gx.Ci.Ci.
                 Cr'.Gy'))),Cr'))
                  $\wedge$  request(A,B,k2,H(H(PSK.exp(Gy',X)).H(Gx.Ci.Ci.Cr'.Gy'))))

end role

role responder(
  A,B: agent,
  PSK: symmetric_key,
  G: text,
  H: hash_func,
  SND, RCV: channel(dy)
)played_by B def=

local
  State: nat,
  Y,Ci,Cr: text,
  Gx,Gy,Gxy: message

init
  State:=1

transition
  1.          State= 1   $\wedge$  RCV(Gx'.Ci') =>
     State':= 3   $\wedge$  Cr':= new()
                  $\wedge$  Y':= new()
                  $\wedge$  Gy':= exp(G,Y')
                  $\wedge$  Gxy':= exp(Gx',Y')
                  $\wedge$  SND(Ci'.Cr'.Gy'.{H(Gx'.Ci'.Ci'.Cr'.Gy')}_H(H(PSK.Gxy')).H(Gx'.Ci'.Ci'.Cr'.Gy'))
                  $\wedge$  witness(B,A,k2,H(H(PSK.Gxy')).H(Gx'.Ci'.Ci'.Cr'.Gy'))

  2.          State= 3
      $\wedge$  RCV(Cr'.{H(H(H(Gx.Ci.Ci.Cr.Gy).{H(Gx.Ci.Ci.Cr.Gy)}_H(H(PSK.Gxy)).H(Gx.Ci.Ci.Cr.Gy))),Cr')}_H(H(PSK
     .Gxy)).H(H(H(Gx.Ci.Ci.Cr.Gy).{H(Gx.Ci.Ci.Cr.Gy)}_H(H(PSK.Gxy)).H(Gx.Ci.Ci.Cr.Gy))),Cr')) =>
```

```
State' := 5
  ∧ request(B,A,k3,H(H(PSK.Gxy).H(H(H(Gx.Ci.Ci.Cr.Gy)).{H(Gx.Ci.Ci.Cr.Gy)}_H(H(PSK.Gxy).H(Gx.Ci.Ci.Cr.
  Gy))).Cr)))
```

```
end role
```

```
role session(
  A,B: agent,
  PSK: symmetric_key,
  G: text,
  H: hash_func
)def=
```

```
local
  SA,RA,SB,RB: channel(dy)
```

```
composition
  initiator(A,B,PSK,G,H,SA,RA) ∧
  responder(A,B,PSK,G,H,SB,RB)
```

```
end role
```

```
role environment()
def=
```

```
const
  a,b,i: agent,
  psk: symmetric_key,
  g: text,
  h: hash_func,
  k2,k3: protocol_id
```

```
intruder_knowledge = {a,b,i,g,h}
```

```
composition
  session(a,b,psk,g,h) ∧
  session(a,i,psk,g,h) ∧
  session(i,b,psk,g,h)
```

```
end role
```

```
goal
```

```
authentication_on k2
authentication_on k3
```

```
end goal
```

```
environment()
```
